# Supplementary material
Source: publisher figshare collection journal article supplement (https://karger.figshare.com/ndownloader/files/31548221)
Supplement: Supplementary file 1 [file 31548221]

| NIRS not reported (n=14) | | Start time not documented (n=15) | NIRS commenced after  6 hours of life (n=25) |
| --- | --- | --- | --- |
| Cunningham et al. 1993 [1] | | Burton et al. 2015 [2] | Alderliesten et al. 2017 [3] |
| De Vis et al., 2014 [4] | | Carrasco et al. 2018 [5] | Bale G et al. 2016 [6] |
| Edwards-Bailey et al. 2016 [7] | | Chalak et al. 2016 [8] | Campbell et al. 2018 [9] |
| Frewen et al 1991 [10] | | Chavez-Valdez et al. 2017 [11] | Chalak et al. 2017 [12] |
| Hanrahan et al. 1996 [13] | | Govindan et al.2016 [14] | Costa et al. 2012 [15] |
| Hebden et al. 2004 [16] | | Howlett et al. 2013 [17] | Dehaes et al. 2014 [18] |
| Kapadia et al. 2013 [19] | | Lee et al. 2017 [20] | Edwards et al. 1988 [21] |
| Kelly et al. 2018 [22] | | Lee et al. 2017 [23] | Estrin et al. 2011 [24] |
| Klinger et al. 2005 [25] | | Meek et al. 1999 [26] | Forman et al.2017 [27] |
| Kusaka et al. 2001 [28] | | Shellhaas et al 2013 [29] | Govindan et al. 2014 [30] |
| Lingappan et al. 2016 [31] | | Shellhaas et al. 2015 [32] | Govindan et al. 2016 [33] |
| Tokuhisa et al. 2015 [34] | | Tekes et al. 2015 [35] | Govindan et al. 2018 [36] |
| Singh et al. 2014 [37] | | Tian et al. 2016 [38] | Holper et al. 2017 [39] |
| Singh et al. 2016 [40] | | Wintermark et al. 2014 [41] | Jain et al. 2017 [42] |
|  | | Zaramella et al. 2007 [43] | Kaya et al. 2014 [44] |
|  | |  | Kondo et al. 2014 [45] |
|  | |  | Massaro et al. 2013 [46] |
|  | |  | Massaro et al. 2015 [47] |
|  | |  | Mitra et al. 2016 [48] |
|  | |  | Mitra et al. 2019 [49] |
|  | |  | Shellhaas et al. 2014 [50] |
|  | |  | Shellhaas et al. 2017 [51] |
|  | |  | Toet et al. 2006 [52] |
|  | |  | Wu et al. 2018 [53] |
|  | |  | Wyatt et al. 1986 [54] |
| Others (n=10) |  | | |
| Bale et al. 2014 [55] | NIRS during desaturation episodes only | | |
| Bale et al. 2019 [56] | NIRS during desaturation episodes only | | |
| Chen et al. 2002 [57] | Effect of auditory stimuli on NIRS | | |
| Gagnon et al. 2016 [58] | Effect of PPHN and HIE | | |
| Kovacsova et al. 2018 [59] | Effect of confounders on different spatially resolved spectroscopy devices | | |
| Skov et al. 1993 [60] | Effect of head tilting in preterm and asphyxiated infants | | |
| Sokoloff et al. 2015 [61] | Effect of seizures on NIRS | | |
| Van Bel et al. 1993 [62] | No standardised assessment of encephalopathy grade used | | |
| van Bel et al. 1998 [63] | Effect of allopurinol on NIRS | | |
| Vesoulis et al. 2018 [64] | NIRS to determine autoregulation threshold | | |

Online Supplementary Table 2. Excluded NIRS studies and reasons for exclusion.

Number in brackets indicates reference number in bibliography below.

References:

1. Cunningham S, Deere S, McIntosh N. Cyclical variation of blood pressure and heart rate in neonates. Arch Dis Child. 1993;69(1 Spec No):64-7.

2. Burton VJ, Gerner G, Cristofalo E, Chung SE, Jennings JM, Parkinson C, et al. A pilot cohort study of cerebral autoregulation and 2-year neurodevelopmental outcomes in neonates with hypoxic-ischemic encephalopathy who received therapeutic hypothermia. BMC Neurol. 2015;15(1).

3. Alderliesten T, De Vis JB, Lemmers PMA, Hendrikse J, Groenendaal F, van Bel F, et al. Brain oxygen saturation assessment in neonates using T-2-prepared blood imaging of oxygen saturation and near-infrared spectroscopy. J Cereb Blood Flow Metab. 2017;37(3):902-13.

4. De Vis JB, Petersen ET, Alderliesten T, Groenendaal F, de Vries LS, van Bel F, et al. Non-invasive MRI measurements of venous oxygenation, oxygen extraction fraction and oxygen consumption in neonates. Neuroimage. 2014;95:185-92.

5. Carrasco M, Perin J, Jennings JM, Parkinson C, Gilmore MM, Chavez-Valdez R, et al. Cerebral Autoregulation and Conventional and Diffusion Tensor Imaging Magnetic Resonance Imaging in Neonatal Hypoxic-Ischemic Encephalopathy. Pediatr Neurol. 2018;82:36-43.

6. Bale G, Mitra S, de Roever I, Chan M, Caicedo-Dorado A, Meek J, et al. Interrelationship Between Broadband NIRS Measurements of Cerebral Cytochrome C Oxidase and Systemic Changes Indicates Injury Severity in Neonatal Encephalopathy. Adv Exp Med Biol. 2016;923:181-6.

7. Edwards-Bailey A, Highton D, Tachtsidis I, Smith M. Investigating the physiological origin of spontaneous changes in cerebral haemodynamics following brain injury. J Cereb Blood Flow Metab. 2016;36:526-8.

8. Chalak LF, Tian FH, Tarumi T, Zhang R. Cerebral Hemodynamics in Asphyxiated Newborns Undergoing Hypothermia Therapy: Pilot Findings Using a Multiple-Time-Scale Analysis. Pediatr Neurol. 2016;55:30-6.

9. Campbell H, Govindan RB, Kota S, Al-Shargabi T, Metzler M, Andescavage N, et al. Autonomic Dysfunction in Neonates with Hypoxic Ischemic Encephalopathy Undergoing Therapeutic Hypothermia Impairs Physiological Responses to Routine Care Events. J Pediatr. 2018;196:38-44.

10. Frewen TC, Kissoon N, Kronick J, Fox M, Lee R, Bradwin N, et al. Cerebral blood flow, cross-brain oxygen extraction, and fontanelle pressure after hypoxic-ischemic injury in newborn infants. J Pediatr. 1991;118(2):265-71.

11. Chavez-Valdez R, O'Connor M, Perin J, Reyes M, Armstrong J, Parkinson C, et al. Sex-specific associations between cerebrovascular blood pressure autoregulation and cardiopulmonary injury in neonatal encephalopathy and therapeutic hypothermia. Pediatr Res. 2017;81(5):759-66.

12. Chalak LF, Tian F, Adams-Huet B, Vasil D, Laptook A, Tarumi T, et al. Novel Wavelet Real Time Analysis of Neurovascular Coupling in Neonatal Encephalopathy. Scientific reports. 2017;7:45958.

13. Hanrahan JD, Sargentoni J, Azzopardi D, Manji K, Cowan FM, Rutherford MA, et al. Cerebral metabolism within 18 hours of birth asphyxia: A proton magnetic resonance spectroscopy study. Pediatr Res. 1996;39(4):584-90.

14. Govindan RB, Massaro A, Chang T, Vezina G, du Plessis A. A novel technique for quantitative bedside monitoring of neurovascular coupling. J Neurosci Methods. 2016;259:135-42.

15. Costa P, Sampaio I, Cardoso K, Moniz C, Grac¸a A. Does cerebral oxygenation aid in outcome prediction in asphyxiated newborns submitted to hypothermia? Arch Dis Child. 2012;97:A306-A7.

16. Hebden JC, Gibson A, Austin T, Yusof RM, Everdell N, Delpy DT, et al. Imaging changes in blood volume and oxygenation in the newborn infant brain using three-dimensional optical tomography. Phys Med Biol. 2004;49(7):1117-30.

17. Howlett JA, Northington FJ, Gilmore MM, Tekes A, Huisman T, Parkinson C, et al. Cerebrovascular autoregulation and neurologic injury in neonatal hypoxic-ischemic encephalopathy. Pediatr Res. 2013;74(5):525-35.

18. Dehaes M, Aggarwal A, Lin PY, Rosa Fortuno C, Fenoglio A, Roche-Labarbe N, et al. Cerebral oxygen metabolism in neonatal hypoxic ischemic encephalopathy during and after therapeutic hypothermia. J Cereb Blood Flow Metab. 2014;34(1):87-94.

19. Kapadia VS, Chalak LF, DuPont TL, Rollins NK, Brion LP, Wyckoff MH. Perinatal asphyxia with hyperoxemia within the first hour of life is associated with moderate to severe hypoxic-ischemic encephalopathy. J Pediatr. 2013;163(4):949-54.

20. Lee JK, Perin J, Parkinson C, O'Connor M, Gilmore MM, Reyes M, et al. Relationships between cerebral autoregulation and markers of kidney and liver injury in neonatal encephalopathy and therapeutic hypothermia. J Perinatol. 2017;37(8):938-42.

21. Edwards AD, Wyatt JS, Richardson C, Delpy DT, Cope M, Reynolds EOR. Cotside measurement of cerebral blood flow in ill newborn infants by near infrared spectroscopy. Lancet. 1988;2(8614):770-1.

22. Kelly R, Ramaiah SM, Sheridan H, Cruickshank H, Rudnicka M, Kissack C, et al. Dose-dependent relationship between acidosis at birth and likelihood of death or cerebral palsy. Arch Dis Child Fetal Neonatal Ed. 2018;103(6):F567-f72.

23. Lee JK, Poretti A, Perin J, Huisman T, Parkinson C, Chavez-Valdez R, et al. Optimizing Cerebral Autoregulation May Decrease Neonatal Regional Hypoxic-Ischemic Brain Injury. Dev Neurosci. 2017;39(1-4):248-56.

24. Estrin V, Simonova A. Clinical and diagnostic value of transcranial cerebral oximetry in the optimization of mechanical ventilation in newborn infants. Critical care. 2011;15:S182.

25. Klinger G, Beyene J, Shah P, Perlman M. Do hyperoxaemia and hypocapnia add to the risk of brain injury after intrapartum asphyxia? Arch Dis Child Fetal Neonatal Ed. 2005;90(1):F49-52.

26. Meek JH, Elwell CE, McCormick DC, Edwards AD, Townsend JP, Stewart AL, et al. Abnormal cerebral haemodynamics in perinatally asphyxiated neonates related to outcome. Arch Dis Child Fetal Neonatal Ed. 1999;81(2):F110-5.

27. Forman E, Breatnach CR, Ryan S, Semberova J, Miletin J, Foran A, et al. Noninvasive continuous cardiac output and cerebral perfusion monitoring in term infants with neonatal encephalopathy: assessment of feasibility and reliability. Pediatr Res. 2017;82(5):789-95.

28. Kusaka T, Isobe K, Nagano K, Okubo K, Yasuda S, Kondo M, et al. Estimation of regional cerebral blood flow distribution in infants by near-infrared topography using indocyanine green. Neuroimage. 2001;13(5):944-52.

29. Shellhaas RA, Thelen BJ, Bapuraj JR, Burns JW, Swenson AW, Christensen MK, et al. Limited short-term prognostic utility of cerebral NIRS during neonatal therapeutic hypothermia. Neurology. 2013;81(3):249-55.

30. Govindan RB, Massaro AN, Andescavage NN, Chang T, du Plessis A. Cerebral pressure passivity in newborns with encephalopathy undergoing therapeutic hypothermia. Front Hum Neurosci. 2014;8(1 APR).

31. Lingappan K, Kaiser JR, Srinivasan C, Gunn AJ. Relationship between PCO2 and unfavorable outcome in infants with moderate-to-severe hypoxic ischemic encephalopathy. Pediatr Res. 2016;80(2):204-8.

32. Shellhaas RA, Kushwaha JS, Plegue MA, Selewski DT, Barks JD. An Evaluation of Cerebral and Systemic Predictors of 18-Month Outcomes for Neonates With Hypoxic Ischemic Encephalopathy. J Child Neurol. 2015;30(11):1526-31.

33. Govindan RB, Al-Shargabi T, Massaro AN, Metzler M, Andescavage NN, Joshi R, et al. Baroreflex dysfunction in sick newborns makes heart rate an unreliable surrogate for blood pressure changes. Pediatr Res. 2016;79(6):929-33.

34. Tokuhisa T, Ibara S, Minakami H, Maede Y, Ishihara C, Matsui T. Outcome of infants with hypoxic ischemic encephalopathy treated with brain hypothermia. J Obstet Gynaecol Res. 2015;41(2):229-37.

35. Tekes A, Poretti A, Scheurkogel MM, Huisman T, Howlett JA, Alqahtani E, et al. Apparent Diffusion Coefficient Scalars Correlate with Near-Infrared Spectroscopy Markers of Cerebrovascular Autoregulation in Neonates Cooled for Perinatal Hypoxic-Ischemic Injury. AJNR Am J Neuroradiol. 2015;36(1):188-93.

36. Govindan RB, Massaro AN, du Plessis A. Ensuring signal quality of cerebral near infrared spectroscopy during continuous longterm monitoring. J Neurosci Methods. 2018;309:147-52.

37. Singh H, Cooper RJ, Wai Lee C, Dempsey L, Edwards A, Brigadoi S, et al. Mapping cortical haemodynamics during neonatal seizures using diffuse optical tomography: a case study. Neuroimage Clin. 2014;5:256-65.

38. Tian F, Tarumi T, Liu H, Zhang R, Chalak L. Wavelet coherence analysis of dynamic cerebral autoregulation in neonatal hypoxic-ischemic encephalopathy. NeuroImage Clin. 2016;11:124-32.

39. Holper L, Mitra S, Bale G, Robertson N, Tachtsidis I. Prediction of brain tissue temperature using near-infrared spectroscopy. Neurophotonics. 2017;4(2).

40. Singh H, Cooper R, Lee CW, Dempsey L, Brigadoi S, Edwards A, et al. Neurovascular Interactions in the Neurologically Compromised Neonatal Brain. In: Elwell CE, Leung TS, Harrison DK, editors. Oxygen Transport to Tissue Xxxvii. Adv Exp Med Biol. 8762016. p. 485-92.

41. Wintermark P, Hansen A, Warfield SK, Dukhovny D, Soul JS. Near-infrared spectroscopy versus magnetic resonance imaging to study brain perfusion in newborns with hypoxic-ischemic encephalopathy treated with hypothermia. NeuroImage. 2014;85:287-93.

42. Jain SV, Pagano L, Gillam-Krakauer M, Slaughter JC, Pruthi S, Engelhardt B. Cerebral regional oxygen saturation trends in infants with hypoxic-ischemic encephalopathy. Early Hum Dev. 2017;113:55-61.

43. Zaramella P, Saraceni E, Freato F, Falcon E, Suppiej A, Milan A, et al. Can tissue oxygenation index (TOI) and cotside neurophysiological variables predict outcome in depressed/asphyxiated newborn infants? Early Hum Dev. 2007;83(8):483-9.

44. Kaya A, Okur M, Sal E, Peker E, Kostu M, Tuncer O, et al. Comparison of Cerebral Oximeter and Pulse Oximeter Values in the First 72 Hours in Premature, Asphyctic and Healthy Newborns. West Indian Med J. 2014;63(7):698-702.

45. Kondo A, Hirose A, Takami T, Sunohara D, Kawashima H. Relationship between cerebral and systemic perfusion, and short-term outcomes in infants with perinatal asphyxia. Arch Dis Child. 2014;99:A380.

46. Massaro AN, Bouyssi-Kobar M, Chang T, Vezina LG, du Plessis AJ, Limperopoulos C. Brain perfusion in encephalopathic newborns after therapeutic hypothermia. AJNR Am J Neuroradiol. 2013;34(8):1649-55.

47. Massaro AN, Govindan RB, Vezina G, Chang T, Andescavage NN, Wang Y, et al. Impaired cerebral autoregulation and brain injury in newborns with hypoxic-ischemic encephalopathy treated with hypothermia. J Neurophysiol. 2015;114(2):818-24.

48. Mitra S, Bale G, Mathieson S, Uria-Avellanal C, Meek J, Tachtsidis I, et al. Changes in Cerebral Oxidative Metabolism during Neonatal Seizures Following Hypoxic Ischemic Brain Injury. Front Pediatr. 2016;4.

49. Mitra S, Bale G, Highton D, Gunny R, Uria-Avellanal C, Bainbridge A, et al. Pressure passivity of cerebral mitochondrial metabolism is associated with poor outcome following perinatal hypoxic ischemic brain injury. J Cereb Blood Flow Metab. 2019;39(1):118-30.

50. Shellhaas RA, Burns JW, Wiggins SA, Christensen MK, Barks JD, Chervin RD. Sleep-wake cycling and cerebral oxygen metabolism among critically ill neonates. J Child Neurol. 2014;29(4):530-3.

51. Shellhaas RA, Burns JW, Hassan F, Carlson MD, Barks JDE, Chervin RD. Neonatal Sleep-Wake Analyses Predict 18-month Neurodevelopmental Outcomes. Sleep. 2017;40(11).

52. Toet MC, Lemmers PMA, Van Schelven LJ, Van Bel F. Cerebral oxygenation and electrical activity after birth asphyxia: Their relation to outcome. Pediatrics. 2006;117(2):333-9.

53. Wu TW, Tamrazi B, Soleymani S, Seri I, Noori S. Hemodynamic Changes During Rewarming Phase of Whole-Body Hypothermia Therapy in Neonates with Hypoxic-Ischemic Encephalopathy. J Pediatr. 2018;197:68-74.e2.

54. Wyatt JS, Delpy DT, Cope M, Wray S, Reynolds EOR. Quantification of Cerebral Oxygenation and Haemodynamics in Sick Newborn Infants by Near-Infrared Spectrophotometry. The Lancet. 1986;328(8515):1063-6.

55. Bale G, Mitra S, Meek J, Robertson N, Tachtsidis I. A new broadband near-infrared spectroscopy system for in-vivo measurements of cerebral cytochrome-c-oxidase changes in neonatal brain injury. Biomed Opt Express. 2014;5(10):3450-66.

56. Bale G, Mitra S, de Roever I, Sokolska M, Price D, Bainbridge A, et al. Oxygen dependency of mitochondrial metabolism indicates outcome of newborn brain injury. J Cereb Blood Flow Metab. 2018.

57. Chen S, Ning P, Sakatani K, Zuo H, Lichty W, Zhao S. Auditory-evoked cerebral oxygenation changes in hypoxic-ischemic encephalopathy of newborn infants monitored by near infrared spectroscopy. Early Hum Dev. 2002;67(1-2):113-21.

58. Gagnon MH, Wintermark P. Effect of persistent pulmonary hypertension on brain oxygenation in asphyxiated term newborns treated with hypothermia. J Matern Fetal Neonatal Med. 2016;29(13):2049-55.

59. Kovacsova Z, Bale G, Mitra S, de Roever I, Meek J, Robertson N, et al. Investigation of Confounding Factors in Measuring Tissue Saturation with NIRS Spatially Resolved Spectroscopy. Adv Exp Med Biol. 2018;1072:307-12.

60. Skov L, Pryds O, Greisen G, Lou H. Estimation of cerebral venous saturation in newborn infants by near infrared spectroscopy. Pediatr Res. 1993;33(1):52-5.

61. Sokoloff MD, Plegue MA, Chervin RD, Barks JD, Shellhaas RA. Phenobarbital and neonatal seizures affect cerebral oxygen metabolism: a near-infrared spectroscopy study. Pediatr Res. 2015;78(1):91-6.

62. Van Bel F, Dorrepaal CA, Benders MJNL, Zeeuwe PEM, Van de Bor M, Berger HM. Changes in cerebral hemodynamics and oxygenation in the first 24 hours after birth asphyxia. Pediatrics. 1993;92(3):365-72.

63. Van Bel F, Shadid M, Moison RMW, Dorrepaal CA, Fontijn J, Monteiro L, et al. Effect of allopurinol on postasphyxial free radical formation, cerebral hemodynamics, and electrical brain activity. Pediatrics. 1998;101(2):185-93.

64. Vesoulis ZA, Liao SM, Mathur AM. Late failure of cerebral autoregulation in hypoxic-ischemic encephalopathy is associated with brain injury: a pilot study. Physiol Meas. 2018;39(12):125004.
